# Supplementary material for: Simple fabrication of flexible electrodes with high metal-oxide content: electrospun reduced tungsten oxide/carbon nanofibers for lithium ion battery applications
Source: Royal Society of Chemistry journal article supplement (doi:10.1039/c4nr01033g), 2014-01-01
Supplement: c4nr01033g1.pdf [file c4nr01033g1.pdf]

## Supporting Information

### **Simple Fabrication of Flexible Electrode with High Metal-Oxide Content: Electrospun Reduced Tungsten Oxide/Carbon Nanofibers for Lithium Ion Battery Applications**

*Jaehyuk Lee, Changshin Jo, Bangrock Park, Woonbong Hwang, Hyung Ik Lee, Songhun  
Yoon, Jinwoo Lee\**

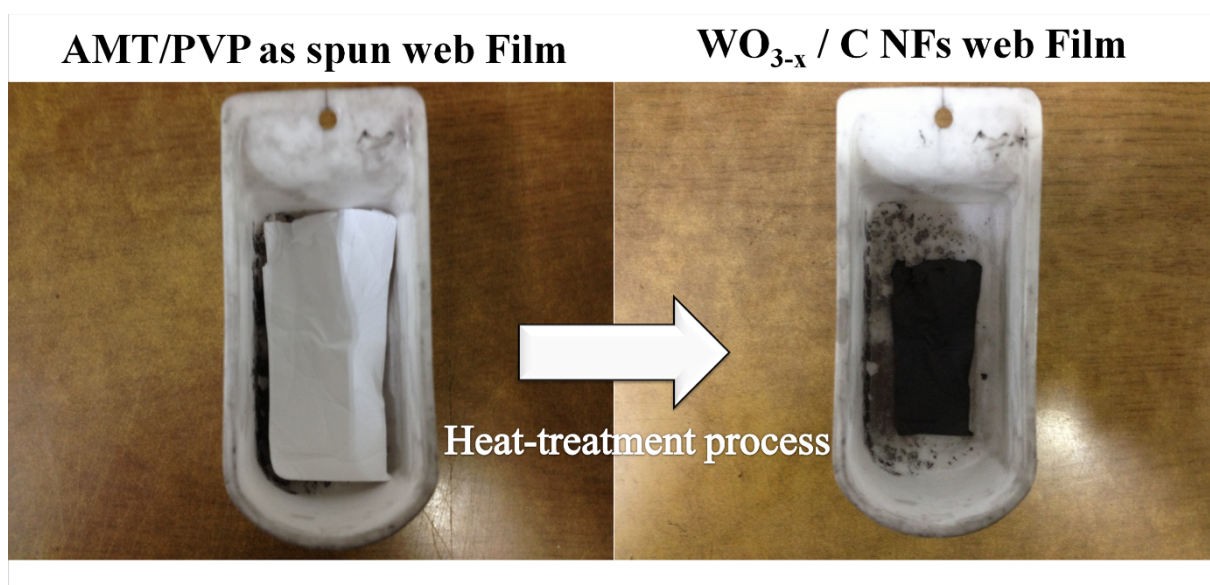

**Figure S1.** Digital photograph of as-spun fiber web (before heat treatment) and  $\text{WO}_x$ -C-NF web (after heat treatment)

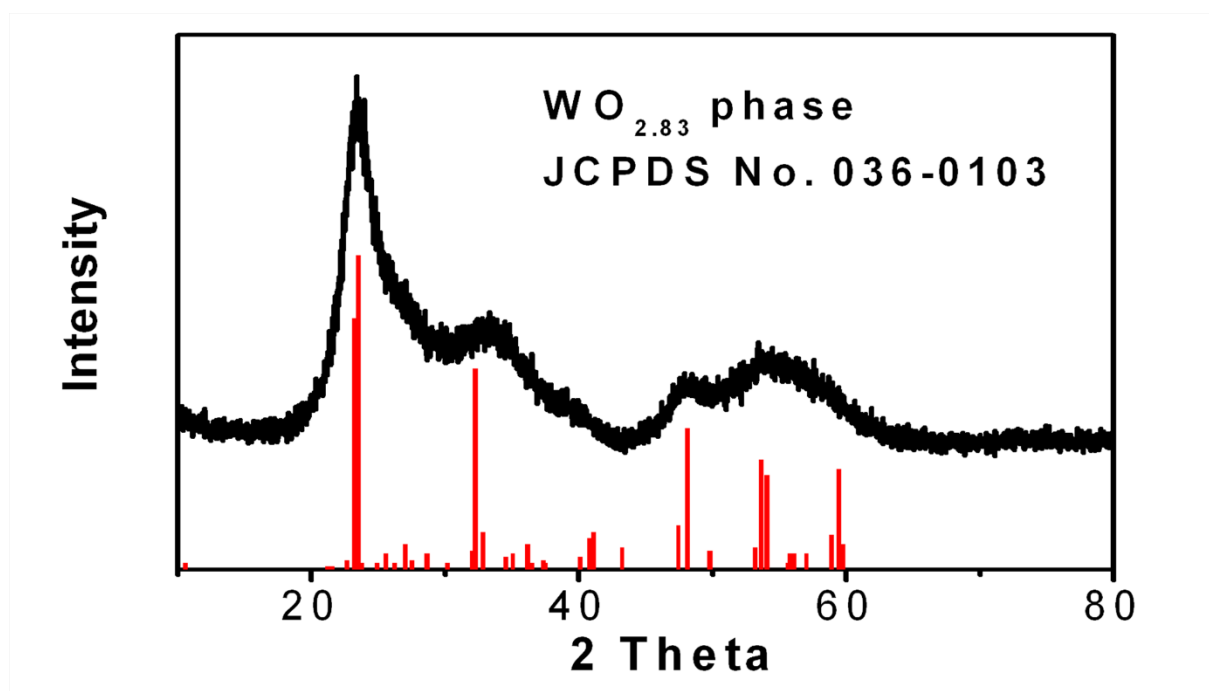

**Figure S2.** XRD pattern of  $\text{WO}_x\text{-C NF}$  ( $\text{WO}_{2.83}$  phase, JCDs NO. 036-0103)

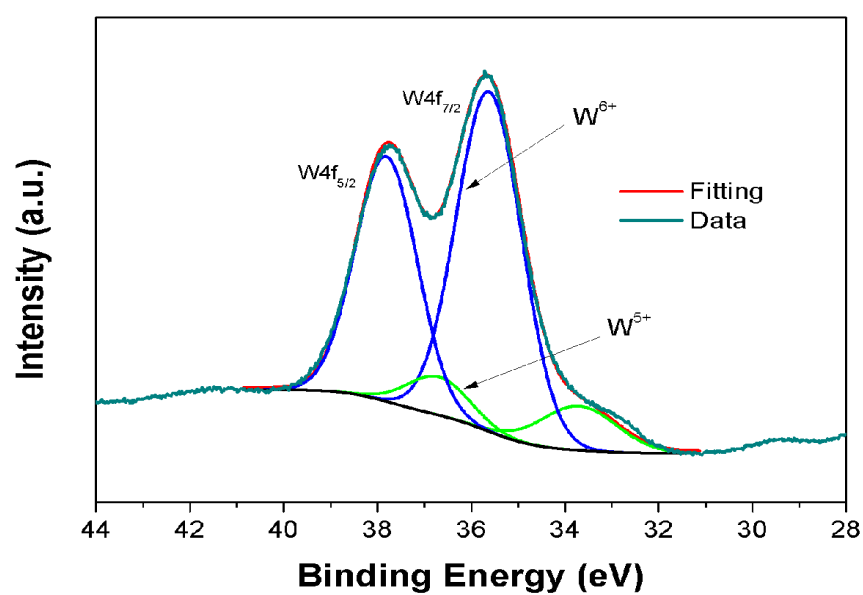

**Figure S3.** X-ray photoelectron spectroscopy of  $\text{WO}_x\text{-C-NF}$  for W 4f. The relative area of  $\text{W}^{5+}$  takes up 13 % of the total area.

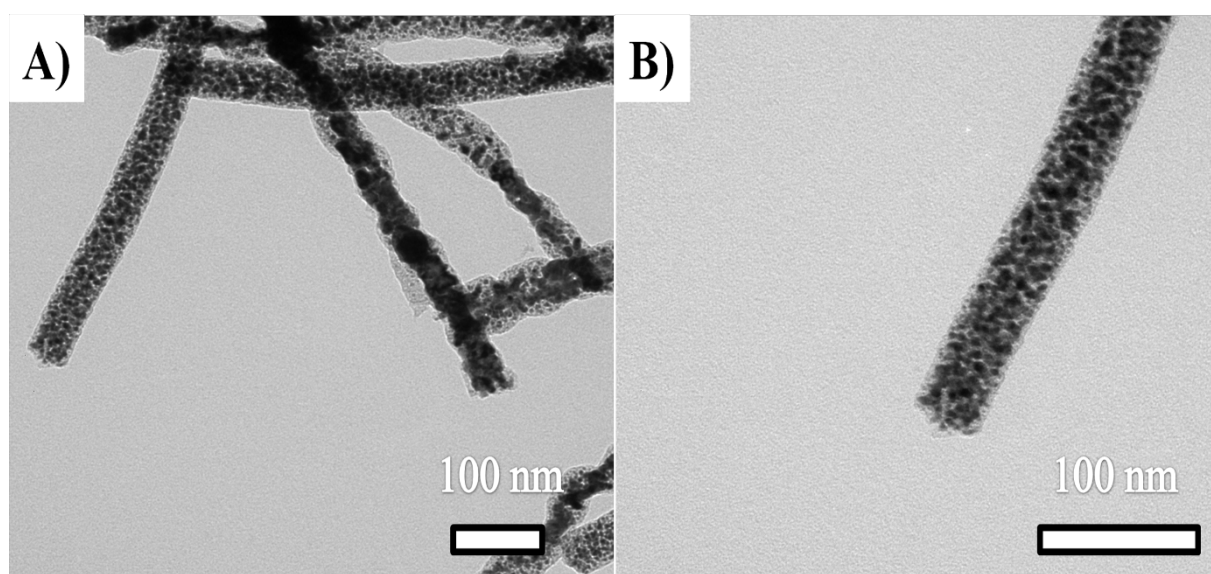

**Figure S4.** TEM images of  $\text{WO}_x\text{-C-NF}$  after heat-treated at 900 °C in nitrogen atmosphere.

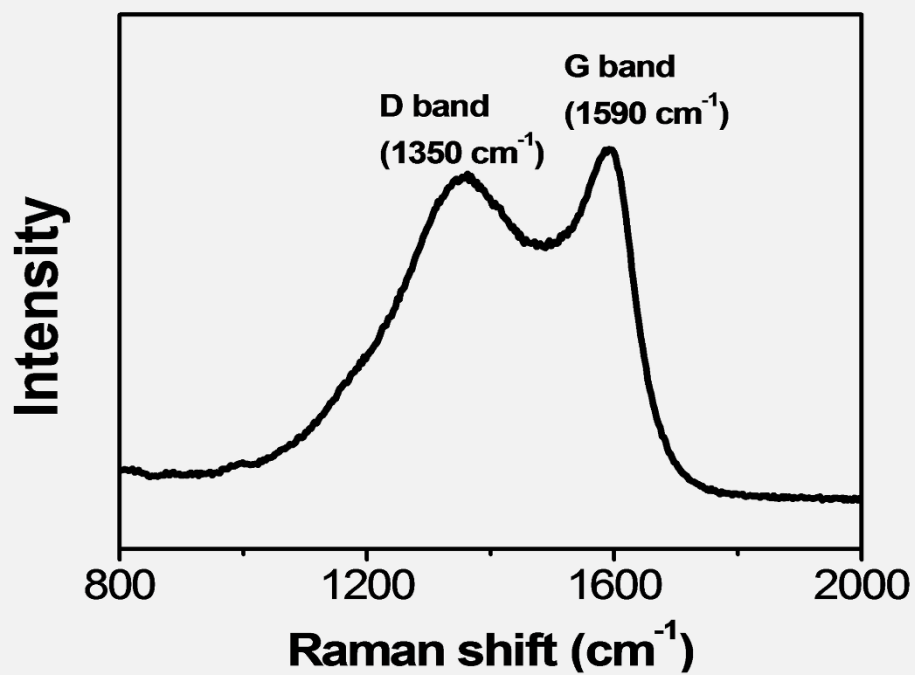

**Figure S5.** Raman spectrum of  $\text{WO}_x\text{-C-NFs}$

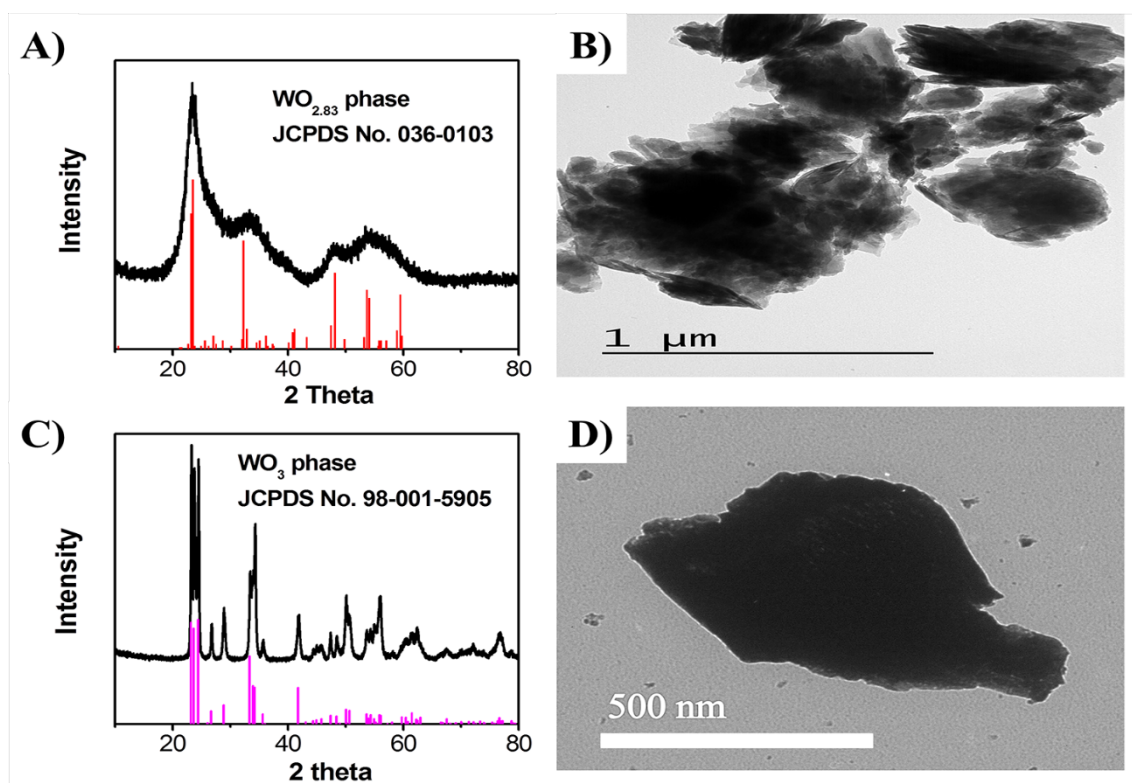

**Figure S6.** A) XRD pattern and B) TEM image of  $\text{WO}_x\text{-C-Nano}$ . C) XRD pattern and D) TEM image of  $\text{WO}_x\text{-Nano}$

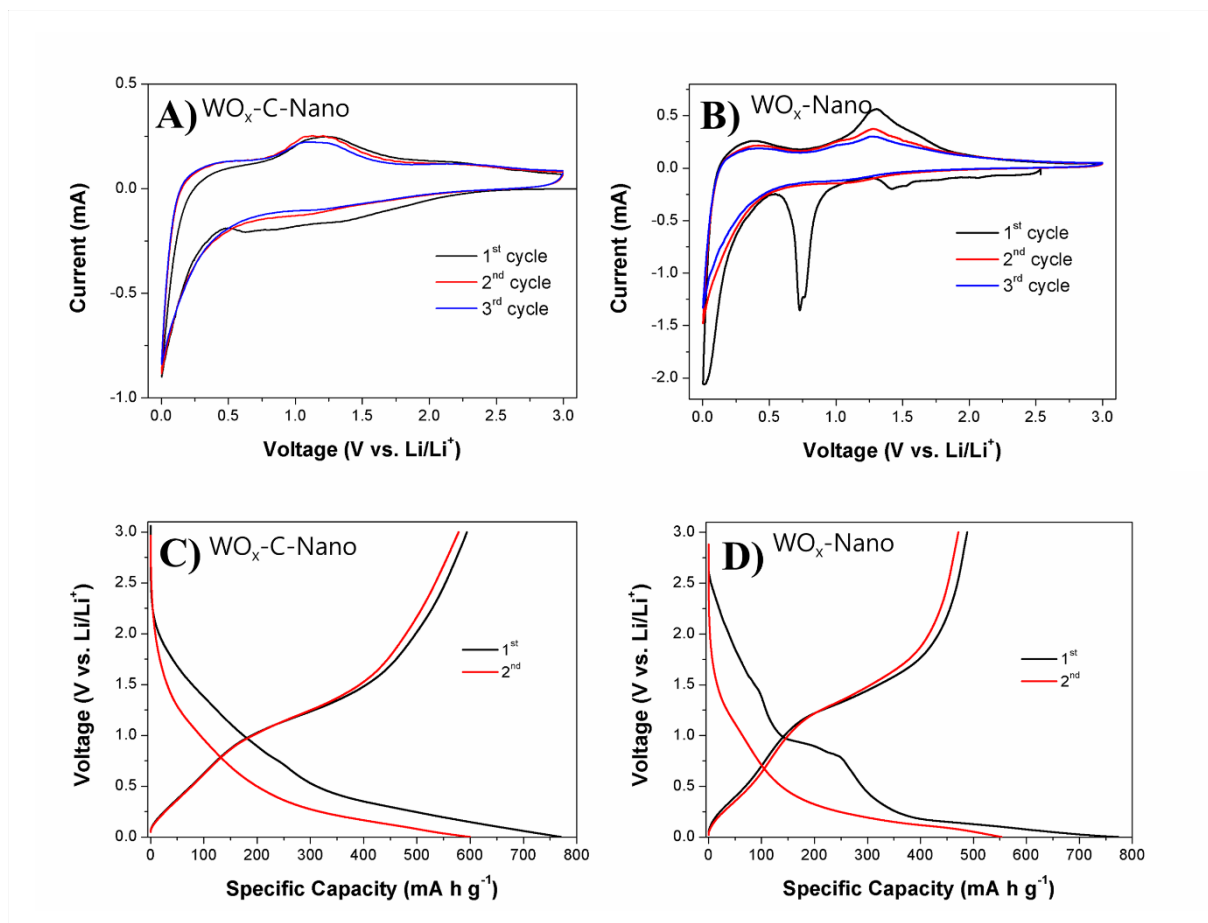

**Figure S7.** (A), (B) Cyclic voltammetry curves and (C), (D) galvanostatic charge/discharge curves of  $\text{WO}_x\text{-C-Nano}$  and  $\text{WO}_x\text{-Nano}$  electrodes. The voltage window has a range of 3.0 to 0.01 V range.

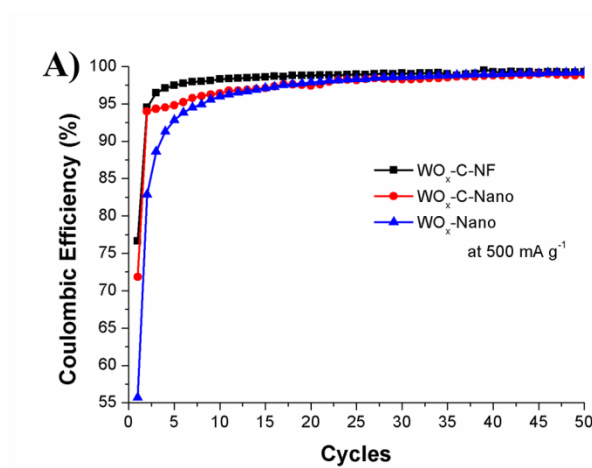

**Figure S8.** Coulombic efficiency versus cycle number plots for (A) WO<sub>x</sub>-C-NF, WO<sub>x</sub>-C-Nano, and WO<sub>x</sub>-Nano electrodes at 500 mA g<sup>-1</sup>.

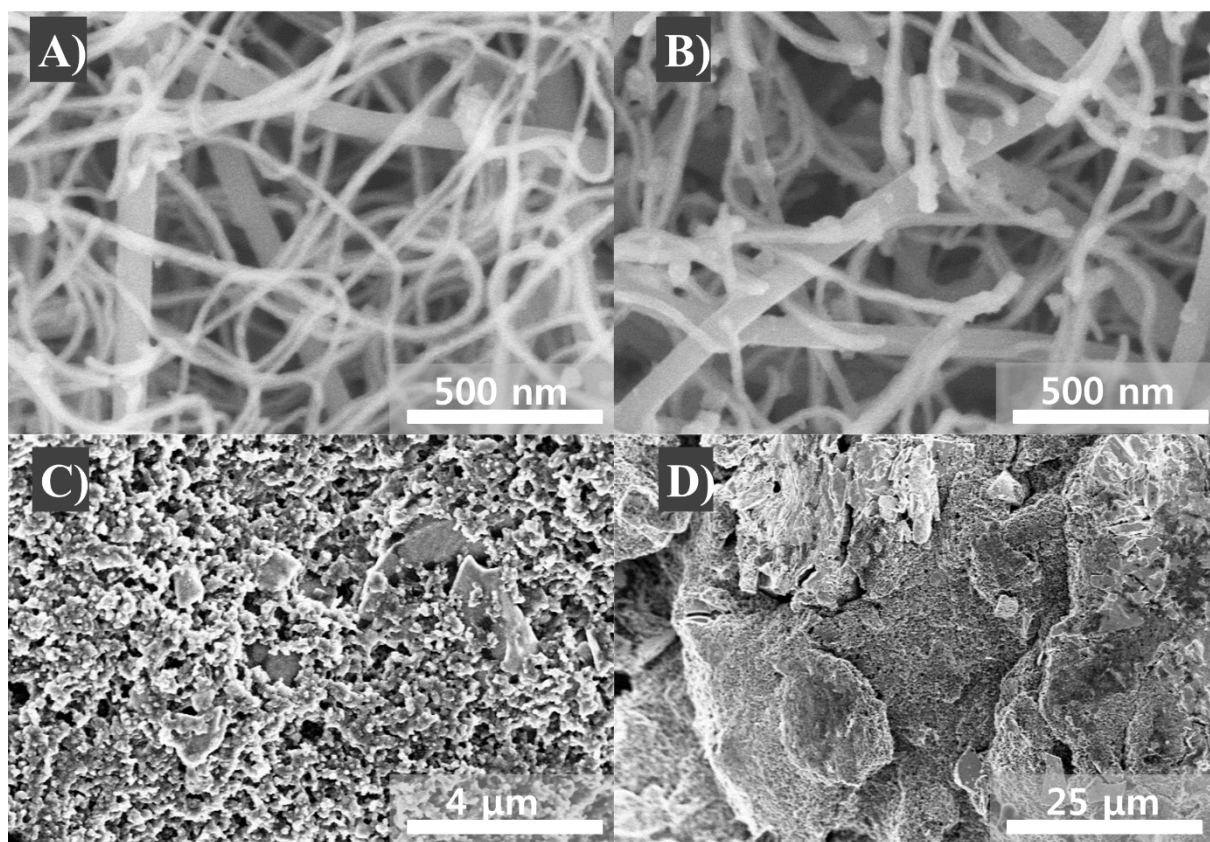

Figure S9. SEM images of (A, B)  $\text{WO}_x\text{-C-NF}$  and (C, D)  $\text{WO}_x\text{-C-Nano}$  after 50 charge-discharge cycles at constant current density of  $50 \text{ mA g}^{-1}$ .
